# Supplementary material for: Selective oxidation of alcohols by graphene-like carbon with electrophilic oxygen and integrated pyridinic nitrogen active sites
Source: Royal Society of Chemistry journal article supplement (doi:10.1039/d1nr03157k), 2021-01-01
Supplement: d1nr03157k1.pdf [file d1nr03157k1.pdf]

## Supporting Information

### **Selective oxidation of alcohols by graphene-like carbon with electrophilic oxygen and integrated pyridinic nitrogen active sites**

*Jiaquan Li,<sup>\*a</sup> Hongqi Sun,<sup>b</sup> Shaobin Wang,<sup>\*c</sup> Yu Dong<sup>d</sup> and Shaomin Liu<sup>a</sup>*

<sup>a</sup> WA School of Mines: Minerals, Energy and Chemical Engineering, Curtin University, Perth, WA 6102, Australia.

<sup>b</sup> School of Engineering, Edith Cowan University, Joondalup, WA 6027, Australia.

<sup>c</sup> School of Chemical Engineering and Advanced Materials, The University of Adelaide, Adelaide, SA 5005, Australia.

<sup>d</sup> School of Civil and Mechanical Engineering, Curtin University, Perth, WA, 6845, Australia.

Corresponding authors:

\* Jiaquan Li ([jiaquan.li@curtin.edu.au](mailto:jiaquan.li@curtin.edu.au))

\* Shaobin Wang. [shaobin.wang@adelaide.edu.au](mailto:shaobin.wang@adelaide.edu.au)

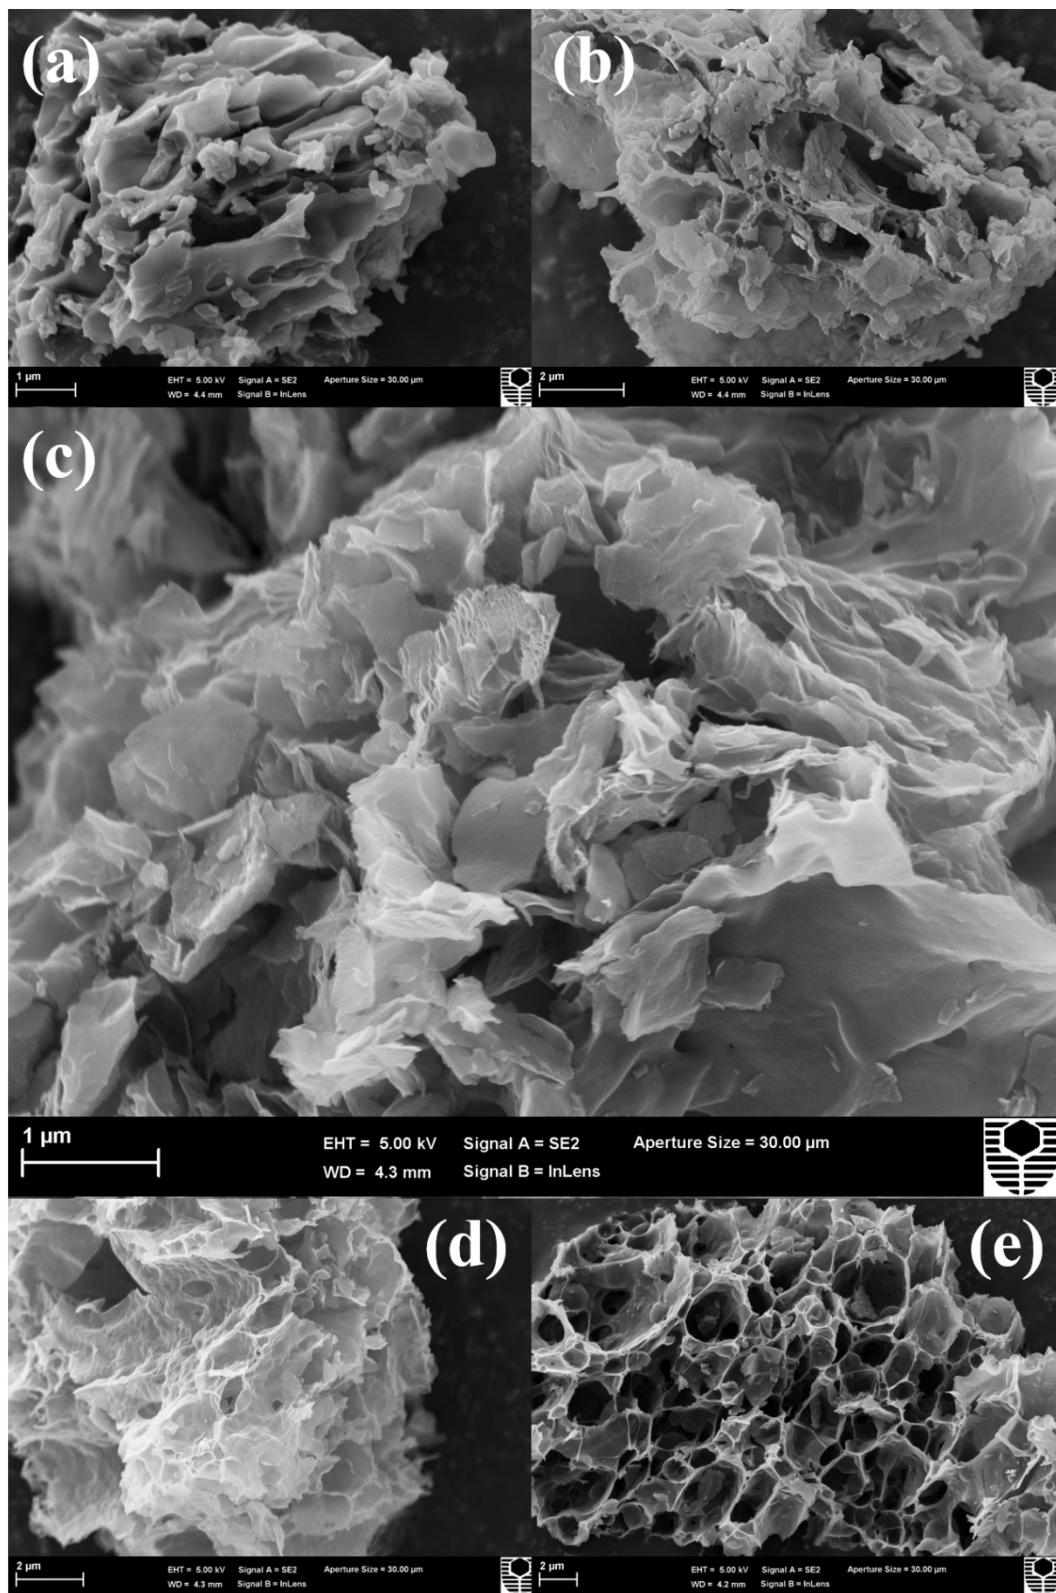

**Fig. S1.** SEM images of (a) NG-600, (b) NG-700, (c) NG-800, (d) NG-900 and (e) NG-1000.

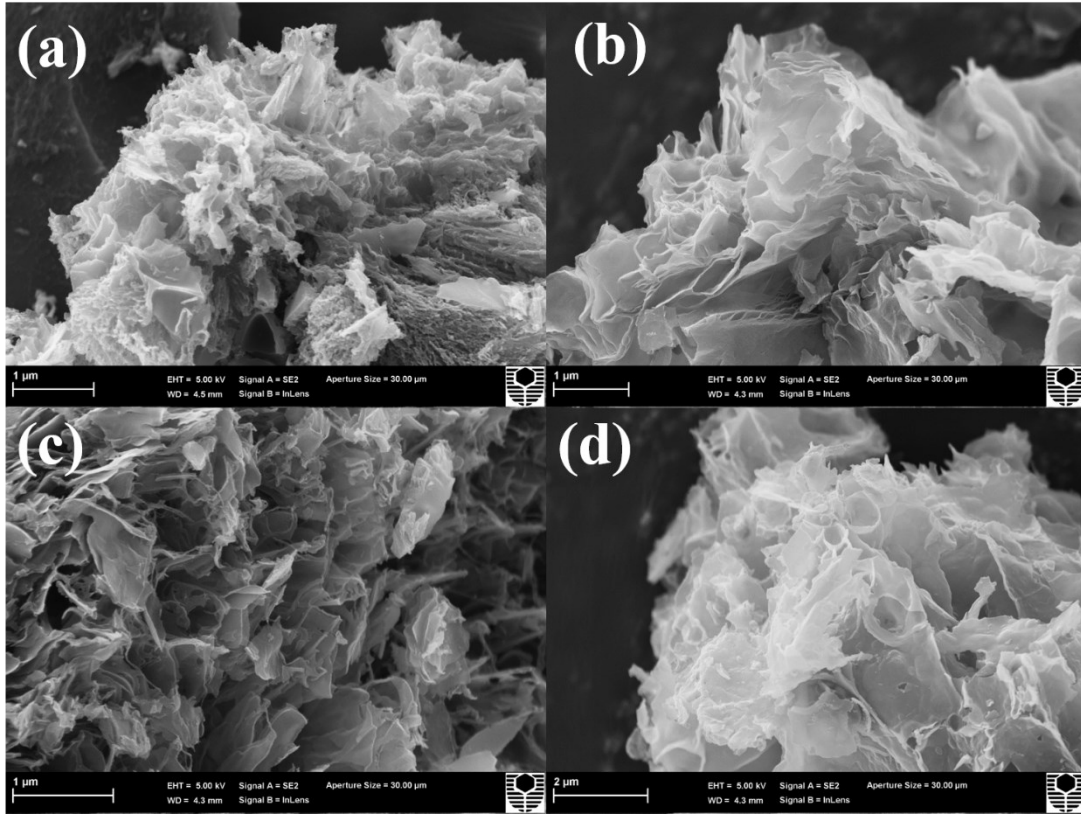

Fig. S2. SEM images of (a) NG(blank), (b) NG(AN), (c) NG(ACI) and (d) NG(MgN)

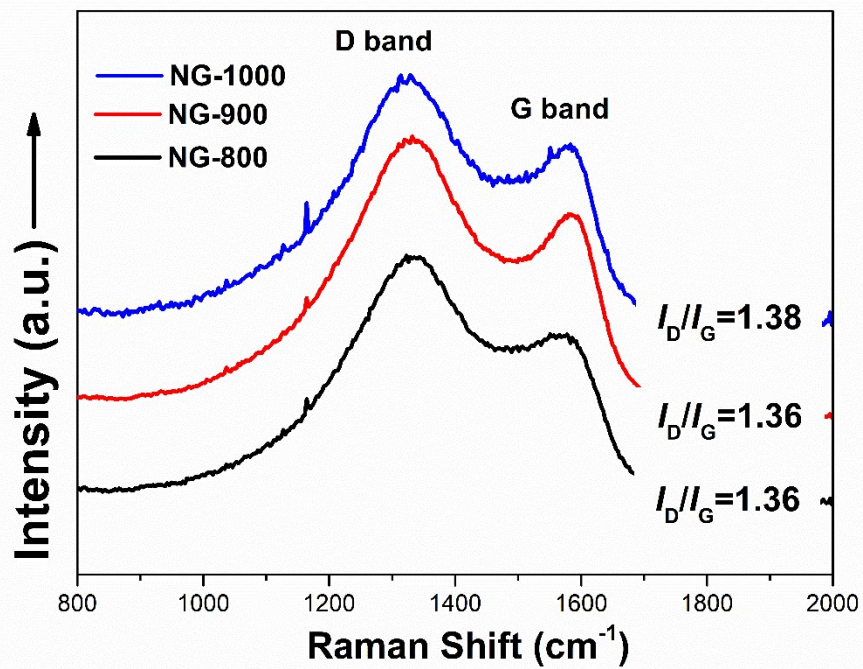

Fig. S3. Raman spectra of NG samples.

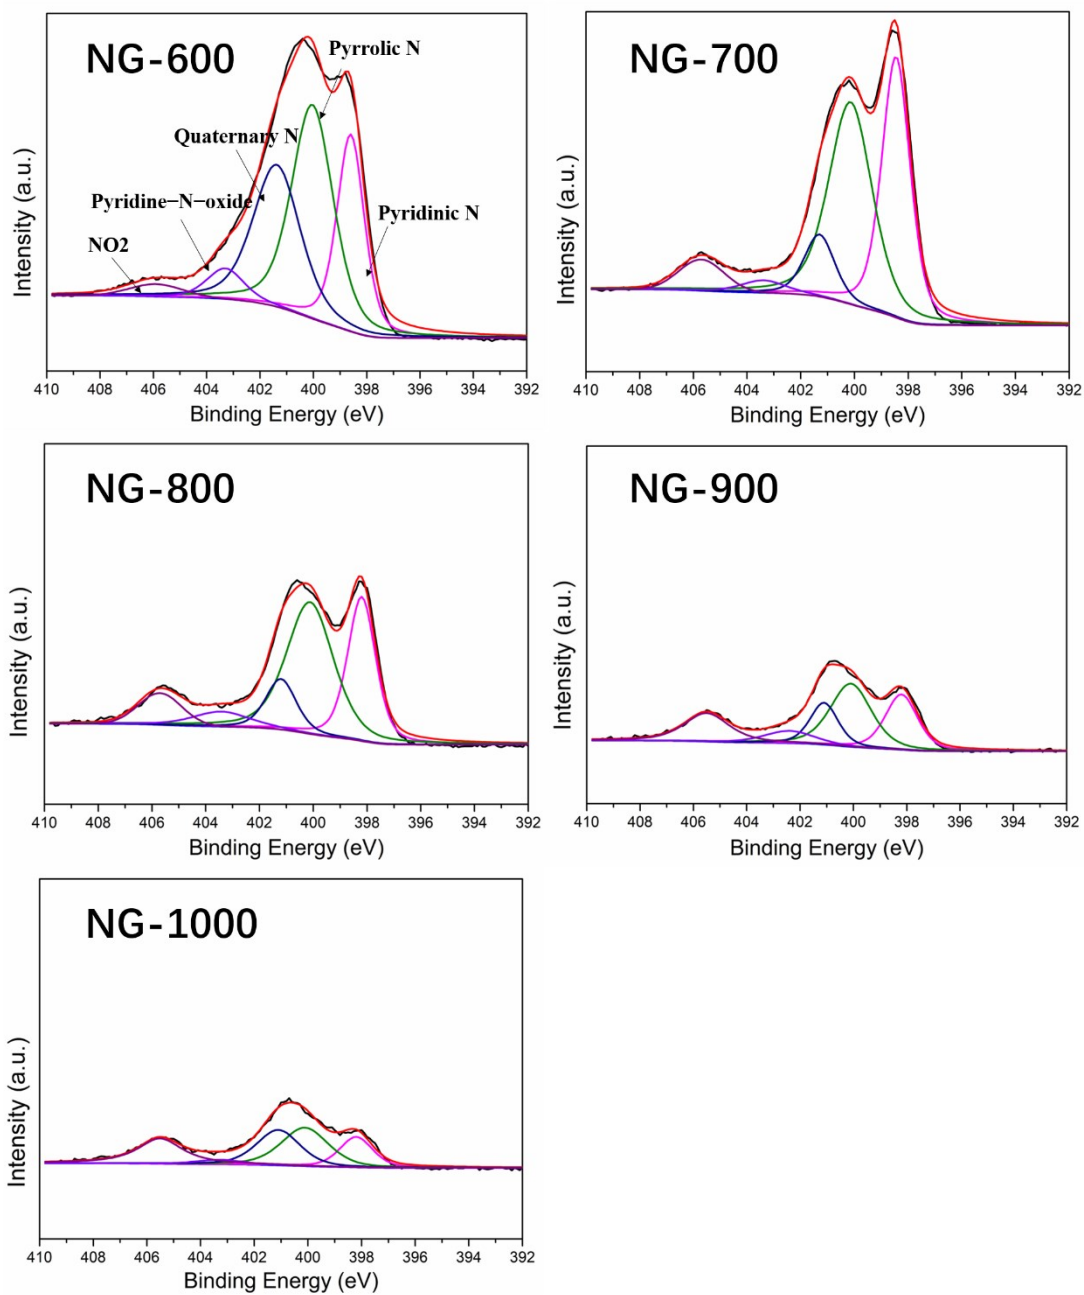

**Fig. S4.** Deconvolution of N1s XPS spectra of NG-600, NG-700, NG-800, NG-900 and NG-1000.

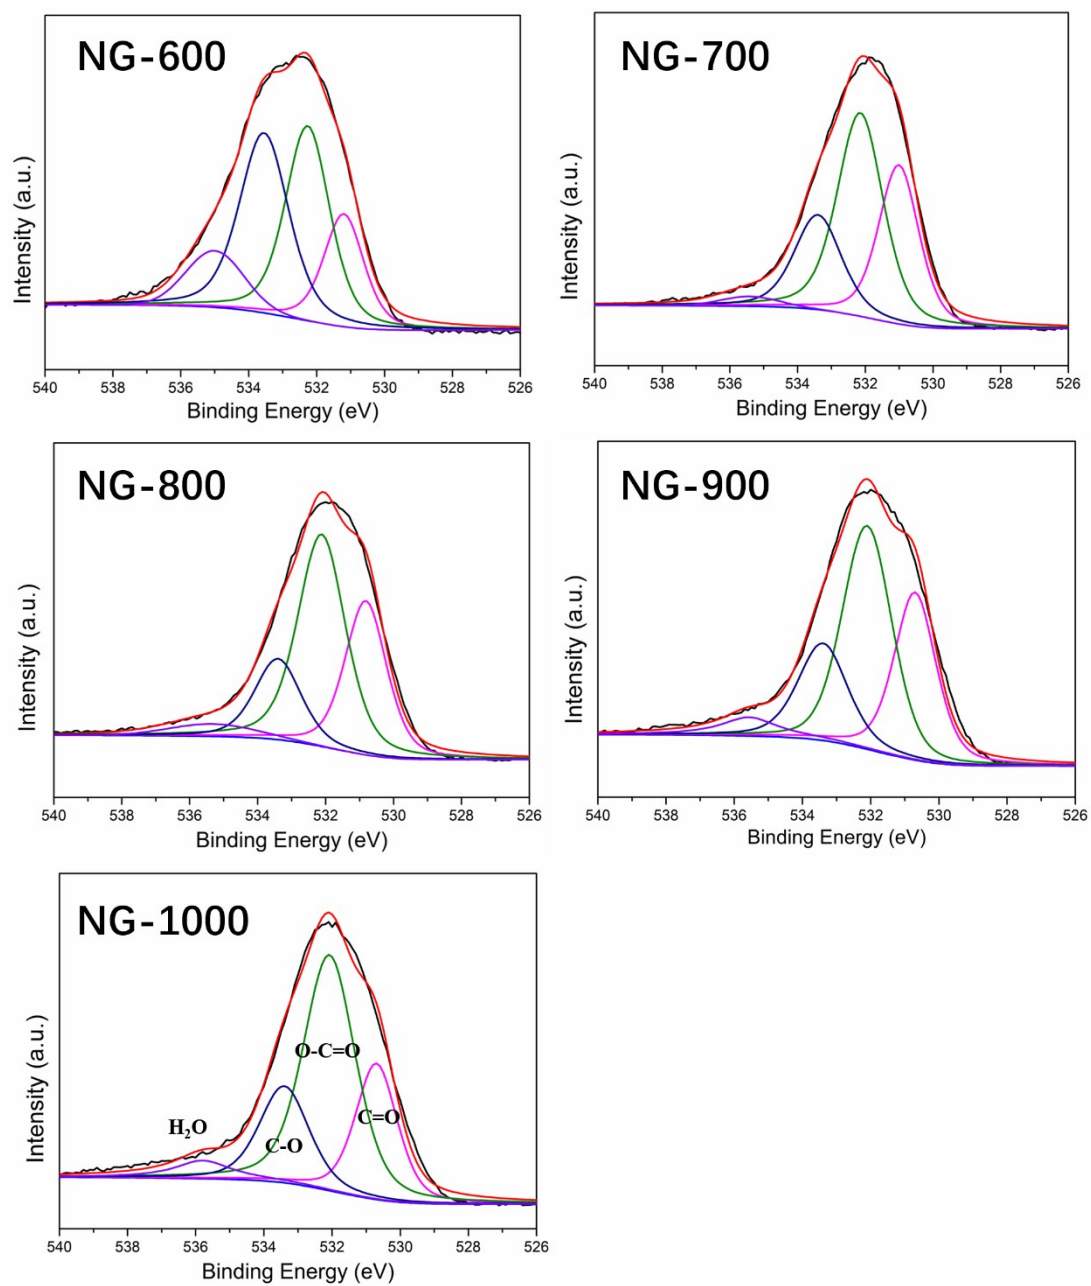

**Fig. S5.** Deconvolution of O1s XPS spectra of NG-600, NG-700, NG-800, NG-900 and NG-1000.

**Table S1.** Composition of O and N species on NG-600, NG-700, NG-800, NG-900 and NG-1000 derived from deconvolution of XPS spectra.<sup>a</sup>

| Samples | Pyridinic N | Pyrolic N | Quaternary N | Pyridine-N-oxide | NO <sub>2</sub> | C=O | O=C-O | C-O | H <sub>2</sub> O |
|---------|-------------|-----------|--------------|------------------|-----------------|-----|-------|-----|------------------|
| NG-600  | 5.5         | 9.1       | 6.9          | 1.2              | 0.6             | 1.7 | 3.2   | 3.3 | 1.0              |
| NG-700  | 6.7         | 7.9       | 1.7          | 0.5              | 1.1             | 3.1 | 4.6   | 2.2 | 0.2              |
| NG-800  | 3.6         | 5.6       | 1.4          | 0.8              | 1.0             | 2.8 | 4.4   | 1.6 | 0.4              |
| NG-900  | 1.7         | 2.5       | 1.1          | 0.6              | 1.3             | 2.9 | 4.3   | 2.0 | 0.6              |
| NG-1000 | 0.8         | 1.5       | 1.2          | 0.2              | 1.1             | 2.1 | 4.5   | 1.7 | 0.5              |

<sup>a</sup> The content of each N or O component is provided in atomic percentage.

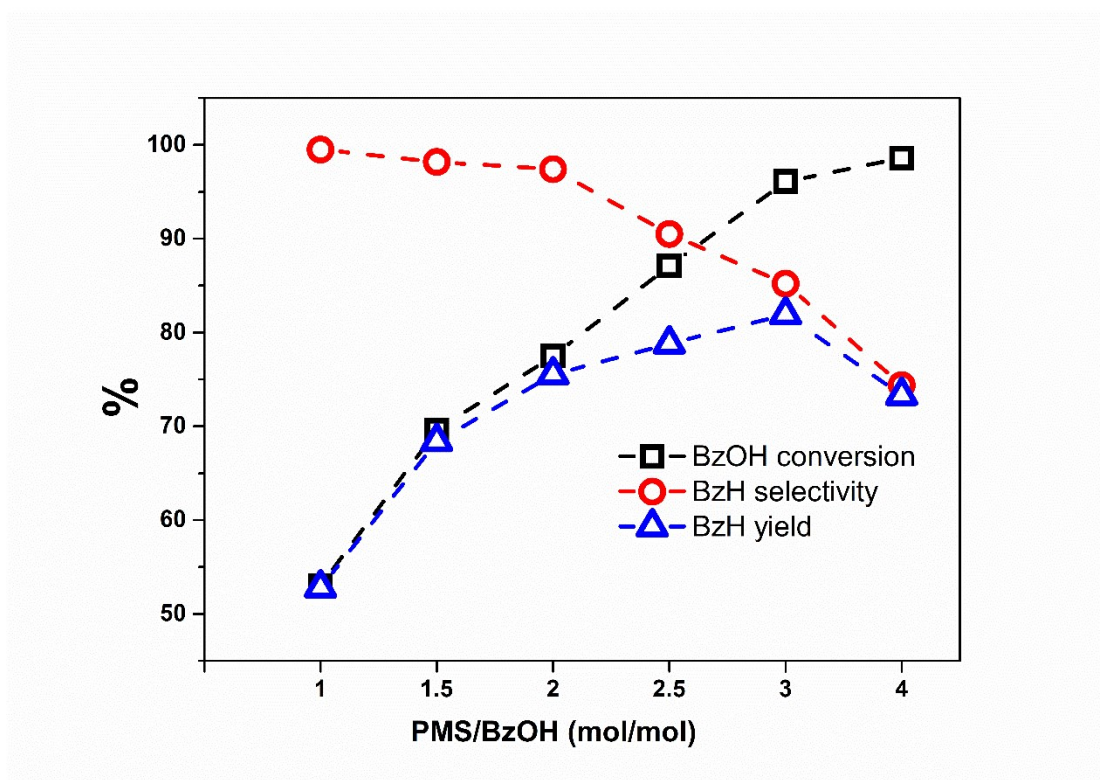

**Fig. S6.** The effect of PMS concentration on the catalytic efficiency of BzOH oxidation with NG-800. Reaction conditions: 5 mg catalyst, 0.1 mmol BzOH, 5 mL acetonitrile/water (1:1, volume ratio), 50 °C, 5 h.

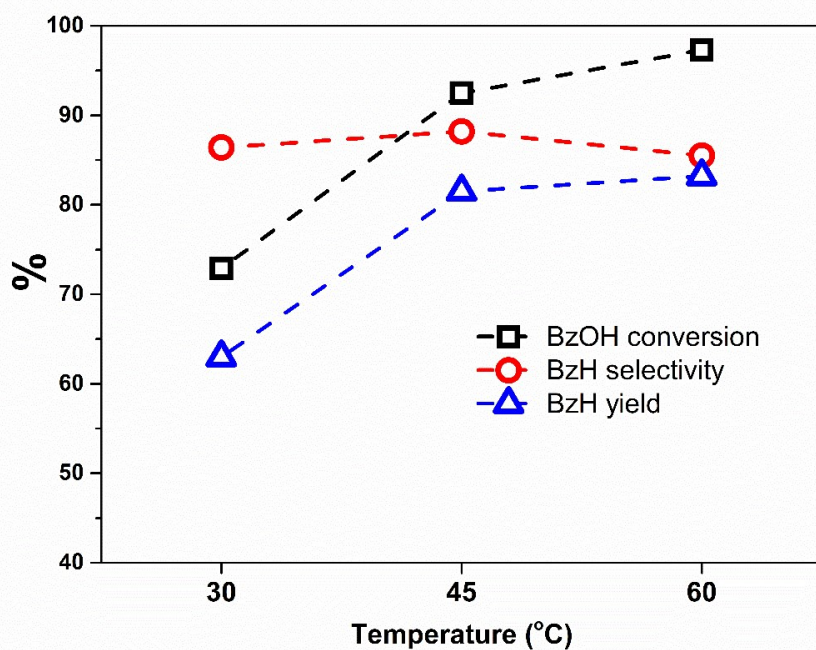

**Fig. S7.** The effect of reaction temperature on the catalytic efficiency of BzOH oxidation with NG-800. Reaction conditions: 5 mg catalyst, 0.1 mmol BzOH, 0.3 mmol PMS, 5 mL acetonitrile/water (1:1, volume ratio), 5 h.

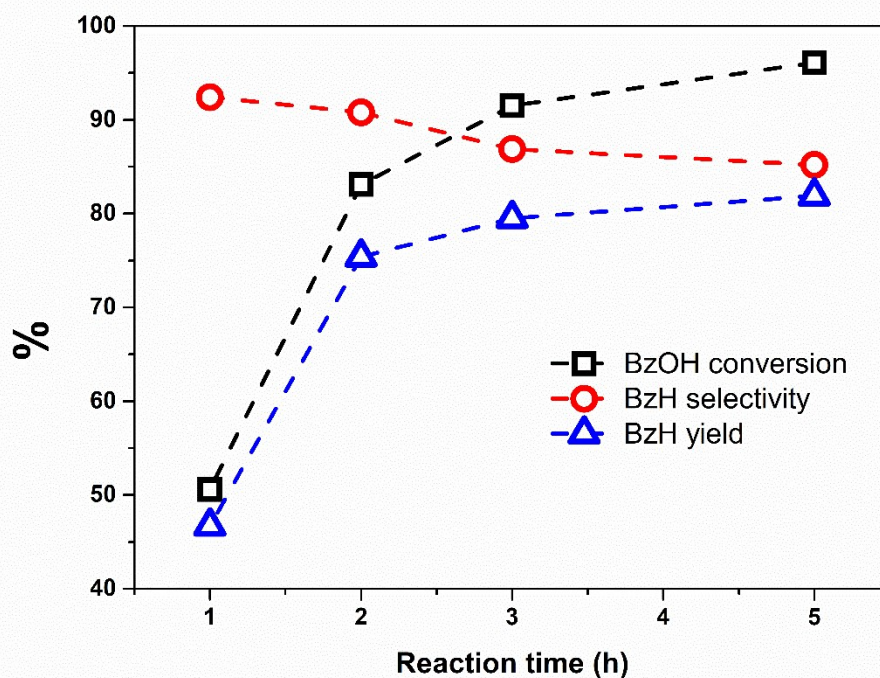

**Fig. S8.** The effect of reaction time on the catalytic efficiency of BzOH oxidation with NG-800. Reaction conditions: 5 mg catalyst, 0.1 mmol BzOH, 0.3 mmol PMS, 5 mL acetonitrile/water (1:1, volume ratio), 50 °C.

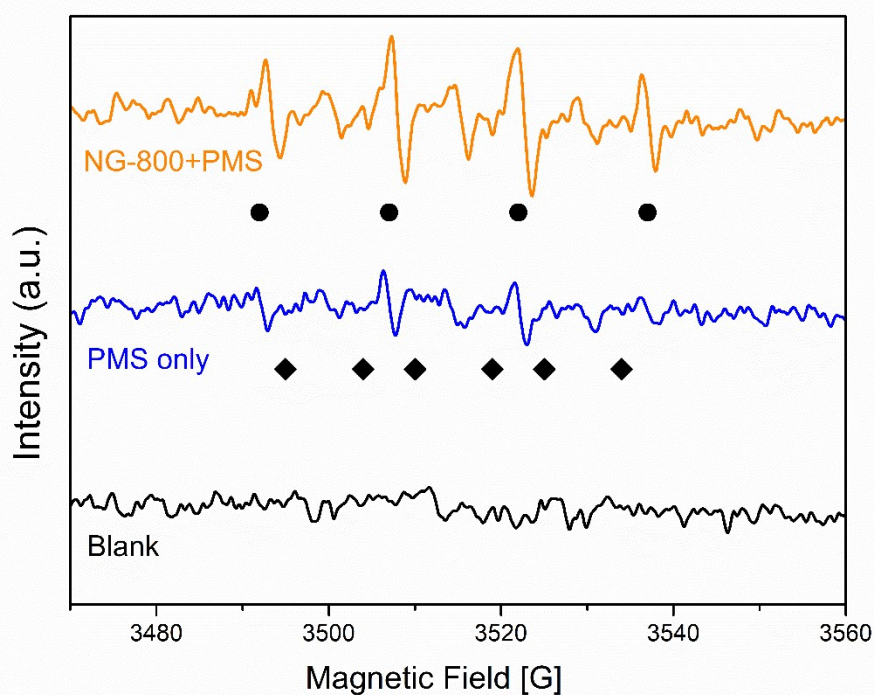

**Fig. S9.** EPR spectra in the presence of DMPO (DMPO- $\cdot$ OH- $\bullet$ , DMPO- $\text{SO}_4^{\cdot-}$ - $\blacklozenge$ ).

**Table S2.** Comparison of the oxidation efficiency of benzyl alcohol in this work with the reported literatures.

| Entry | Catalyst loading<br>(relative to the mass of<br>BzOH) | Oxidant                | T/°C | t/h | Additive | BzOH<br>conversion/<br>% | BzH<br>selectivity<br>/% | BzH<br>yield/% | Ref    |
|-------|-------------------------------------------------------|------------------------|------|-----|----------|--------------------------|--------------------------|----------------|--------|
| 1     | Graphene oxide (200%)                                 | O <sub>2</sub> /1 atm  | 100  | 24  | –        | –                        | –                        | 90             | [1]    |
| 2     | NCNT (2%)                                             | O <sub>2</sub> /15 atm | 130  | 8   | –        | 44.7                     | 94.1                     | –              | [2]    |
| 3     | N-graphene (300%)                                     | O <sub>2</sub> /1 atm  | 70   | 10  | –        | 12.8                     | 100                      | –              | [3]    |
| 4     | P-doped carbon (80%)                                  | Air/1 atm              | 120  | 5   | –        | –                        | –                        | 99.7           | [4]    |
| 5     | AuPd bimetal (0.5%)                                   | O <sub>2</sub> /8 atm  | 110  | 1   | –        | 83                       | 70                       | –              | [5]    |
| 6     | NiFe <sub>2</sub> O <sub>4</sub> (10%)                | TBHP                   | 60   | 3   | –        | –                        | –                        | 85             | [6]    |
| 7     | Au/Al <sub>2</sub> O <sub>3</sub> (2.5%)              | TBHP                   | 125  | 5   | –        | 89.9                     | 89.2                     | –              | [7]    |
| 8     | N-nanodiamond (5%)                                    | TBHP                   | 70   | 24  | –        | 88.5                     | 99                       | –              | [8]    |
| 9     | –                                                     | PMS                    | –    | 3   | NaBr     | –                        | –                        | 87             | [9]    |
| 10    | Carbon nanotubes (50%)                                | PMS                    | 50   | 5   | –        | 57.1                     | 84.3                     | 48.1           | [10]   |
| 11    | NG (50%)                                              | PMS                    | 50   | 5   | –        | 96.1                     | 85.2                     | 81.9           | Herein |



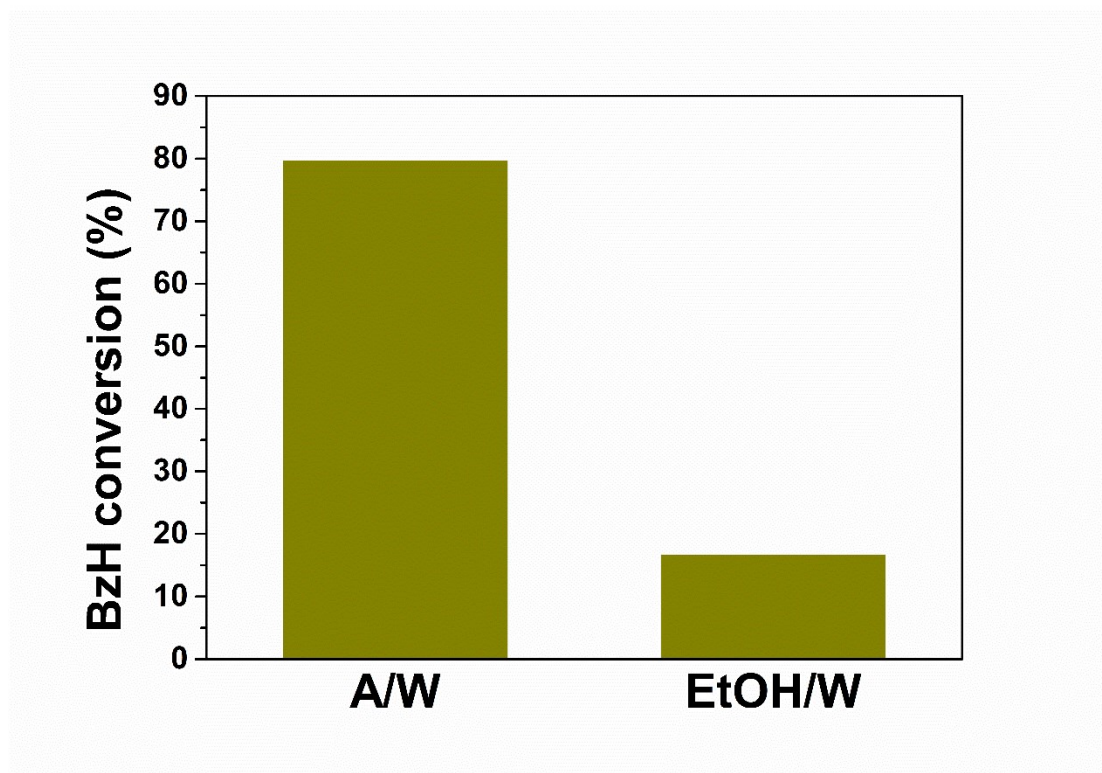

**Fig. S10.** The oxidation of BzH with NG-800 in acetonitrile/water 1:1 solvent (A/W) and ethanol/water 1:1 solvent (EtOH/W). Reaction conditions: 5 mg catalyst, 0.1 mmol BzH, 0.2 mmol PMS, 5 mL acetonitrile/water (1:1, volume ratio), 50 °C, 5 h.

## References

- [1] S. Presolski, M. Pumera, Graphene Oxide: Carbocatalyst or Reagent?, *Angew. Chem. Int. Ed.*, 57 (2018) 16713-16715.
- [2] J. Luo, H. Yu, H. Wang, H. Wang, F. Peng, Aerobic oxidation of benzyl alcohol to benzaldehyde catalyzed by carbon nanotubes without any promoter, *Chem. Eng. J.*, 240 (2014) 434-442.
- [3] J. Long, X. Xie, J. Xu, Q. Gu, L. Chen, X. Wang, Nitrogen-Doped Graphene Nanosheets as Metal-Free Catalysts for Aerobic Selective Oxidation of Benzylic Alcohols, *ACS Catal.*, 2 (2012) 622-631.
- [4] Z. Long, L. Sun, W. Zhu, G. Chen, X. Wang, W. Sun, P-Doped carbons derived from cellulose as highly efficient metal-free catalysts for aerobic oxidation of benzyl alcohol in water under an air atmosphere, *Chem. Commun.*, 54 (2018) 8991-8994.
- [5] P. Wu, Y. Cao, L. Zhao, Y. Wang, Z. He, W. Xing, P. Bai, S. Mintova, Z. Yan, Formation of PdO on Au-Pd bimetallic catalysts and the effect on benzyl alcohol oxidation, *J. Catal.*, 375 (2019) 32-43.
- [6] S. Iraqui, S.S. Kashyap, M.H. Rashid, NiFe<sub>2</sub>O<sub>4</sub> nanoparticles: an efficient and reusable catalyst for the selective oxidation of benzyl alcohol to benzaldehyde under mild conditions, *Nanoscale Advances*, 2 (2020) 5790-5802.
- [7] M.J. Ndolomingo, R. Meijboom, Selective liquid phase oxidation of benzyl alcohol to

benzaldehyde by tert-butyl hydroperoxide over  $\gamma$ -Al<sub>2</sub>O<sub>3</sub> supported copper and gold nanoparticles, *Appl. Surf. Sci.*, 398 (2017) 19-32.

[8] Y. Lin, Z. Liu, Y. Niu, B. Zhang, Q. Lu, S. Wu, G. Centi, S. Perathoner, S. Heumann, L. Yu, D.S. Su, Highly Efficient Metal-Free Nitrogen-Doped Nanocarbons with Unexpected Active Sites for Aerobic Catalytic Reactions, *ACS Nano*, 13 (2019) 13995-14004.

[9] B.-S. Koo, C.K. Lee, K.-J. Lee, OXIDATION OF BENZYL ALCOHOLS WITH OXONE® AND SODIUM BROMIDE, *Synth. Commun.*, 32 (2002) 2115-2123.

[10] J. Li, M. Li, H. Sun, Z. Ao, S. Wang, S. Liu, Understanding of the Oxidation Behavior of Benzyl Alcohol by Peroxymonosulfate via Carbon Nanotubes Activation, *ACS Catal.*, 10 (2020) 3516-3525.
